# Supplementary material
Source: MDPI journal article supplement (https://www.mdpi.com/2073-4344/14/2/131)
Supplement: s1 [file s1]

## Supporting Information

# Improvement of $\text{NH}_3$ -SCR Performance by Exposing Different Active Components in the VCeMn/Ti Catalytic System

Shifei Gu <sup>1,2</sup>, Chengheng Huang <sup>1,2</sup>, Xiaorong Han <sup>1,2</sup>, Qiuju Qin <sup>1,2</sup>, Donghai Mo <sup>1,2</sup>, Chen Li <sup>1,2</sup>, Yuhua You <sup>1,2</sup>, Lihui Dong <sup>1,2</sup> and Bin Li <sup>1,2,\*</sup>

<sup>1</sup> A State Key Laboratory of Featured Metal Materials and Life-Cycle Safety for Composite Structures, Guangxi University, Nanning 530004, China; 2214301014@st.gxu.edu.cn (S.G.); 2214301028@st.gxu.edu.cn (C.H.); 2214301019@st.gxu.edu.cn (X.H.); 1914301051@st.gxu.edu.cn (Q.Q.); 2114301103@st.gxu.edu.cn (D.M.); 2204200247@st.gxu.edu.cn (Y.Y.); 2114301035@st.gxu.edu.cn (C.L.); donglh@gxu.edu.cn (L.D.)

<sup>2</sup> Guangxi Colleges and Universities Key Laboratory of Applied Chemistry Technology and Resource Development, School of Chemistry and Chemical Engineering, Guangxi University, Nanning 530004, China

\* Correspondence: binli@gxu.edu.cn; Tel.: +86-139-7881-1632

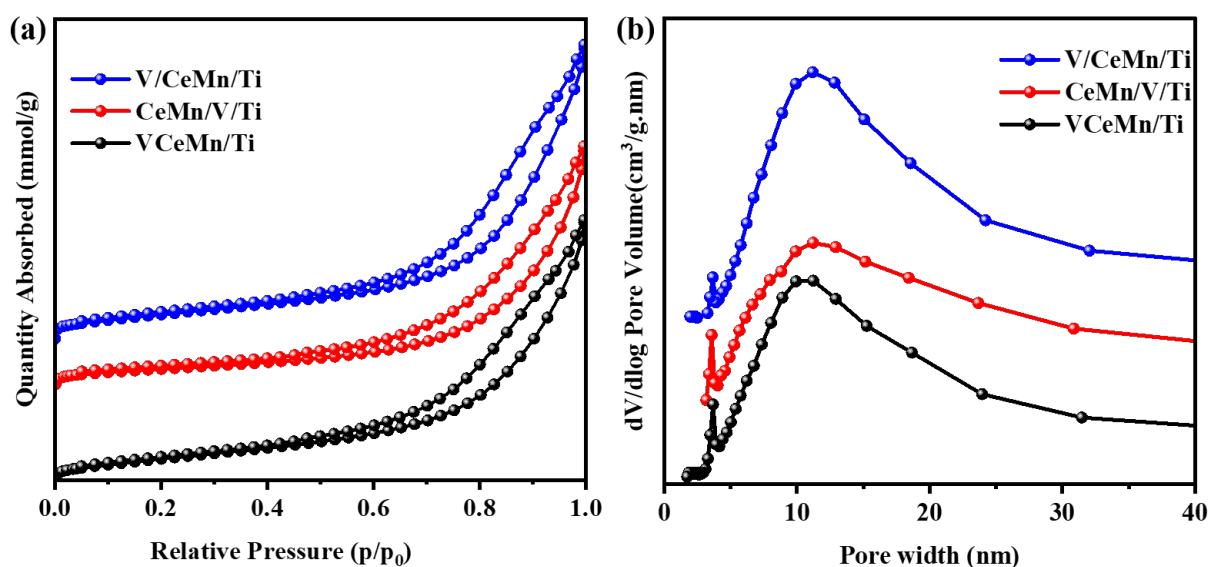

Figure S1. (a)  $\text{N}_2$  adsorption-desorption isotherms; (b) BJH pore size distribution curves.

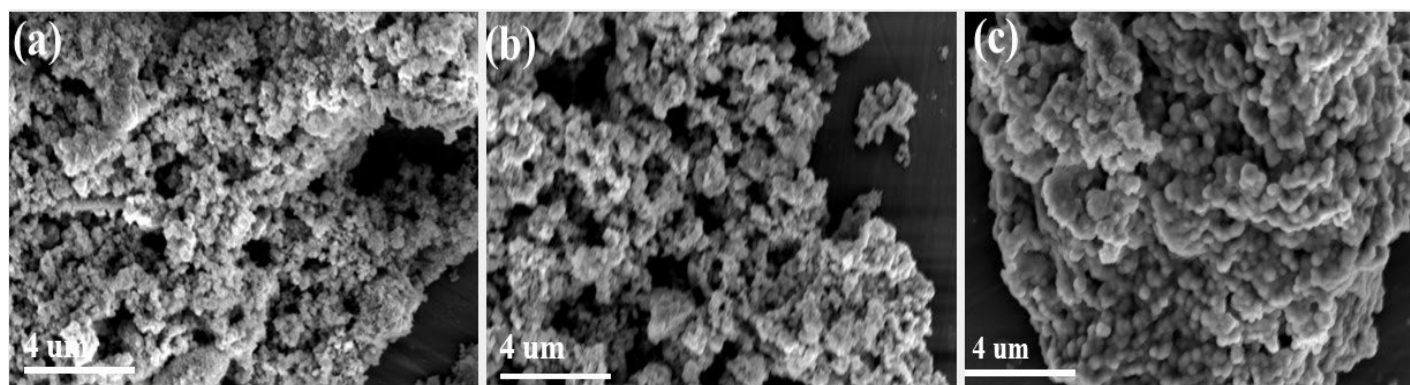

Figure S2. SEM images of catalysts: (a) V/CeMn/Ti; (b) CeMn/V/Ti; (c) VCeMn/Ti.
